# Supplementary material for: The effect of Patient’s Own Medication use on patient’s self-reported medication knowledge during hospitalisation: a pre-post intervention study
Source: Springer Nature journal article supplement (doi:10.1186/s12913-022-07752-6), 2022-03-30
Supplement: MOESM1 [file 20268668]

# The effect of Patient's Own Medication use on patient's self-reported medication knowledge during hospitalisation: a pre-post intervention study

Authors

Loes J.M. van Herpen-Meeuwissen<sup>1,2</sup>, Bart J.F. van den Bemt<sup>1,3,4</sup>, Hieronymus J. Derijks<sup>1,5</sup>, Patricia M.L.A. van den Bemt<sup>6</sup>, Barbara Maat<sup>2</sup>, Hein A.W. van Onzenoort<sup>1,4</sup>

Patient questionnaire with statements on perceived medication knowledge, medication safety, the provision of information, and inpatient medication use.

|                                                                |                                                                                                                                                                                                                                               |                 |                |              |                      |
|----------------------------------------------------------------|-----------------------------------------------------------------------------------------------------------------------------------------------------------------------------------------------------------------------------------------------|-----------------|----------------|--------------|----------------------|
| <b>Date</b>                                                    | .. / .. / .....                                                                                                                                                                                                                               |                 |                |              |                      |
| <b>Gender</b>                                                  | Male – Female                                                                                                                                                                                                                                 |                 |                |              |                      |
| <b>Year of birth</b>                                           | .....                                                                                                                                                                                                                                         |                 |                |              |                      |
| <b>Educational level</b>                                       | <input type="checkbox"/> Elementary school<br><input type="checkbox"/> Lower secondary education<br><input type="checkbox"/> Upper secondary school<br><input type="checkbox"/> Bachelor degree or higher<br><input type="checkbox"/> Unknown |                 |                |              |                      |
| <b>Marital status</b>                                          | <input type="checkbox"/> Single<br><input type="checkbox"/> Partner, not married<br><input type="checkbox"/> Married<br><input type="checkbox"/> Divorced<br><input type="checkbox"/> Widow/widower<br><input type="checkbox"/> Unknown       |                 |                |              |                      |
| <b>Do you receive help with medication management at home?</b> | Yes – No                                                                                                                                                                                                                                      |                 |                |              |                      |
| <b>What is your first language</b>                             | .....                                                                                                                                                                                                                                         |                 |                |              |                      |
| <i>Please response to the statements about medication use</i>  |                                                                                                                                                                                                                                               |                 |                |              |                      |
|                                                                | <b>Totally disagree</b>                                                                                                                                                                                                                       | <b>Disagree</b> | <b>Neutral</b> | <b>Agree</b> | <b>Totally agree</b> |
| 01. I always take my prescribed medicine                       |                                                                                                                                                                                                                                               |                 |                |              |                      |
| 02. I always take the prescribed amount of medicine            |                                                                                                                                                                                                                                               |                 |                |              |                      |
| 03. I always use my medicine at the prescribed time            |                                                                                                                                                                                                                                               |                 |                |              |                      |

Please response to the statements below at your hospital admission.

|                                                              |                         |                 |                |              |                      |
|--------------------------------------------------------------|-------------------------|-----------------|----------------|--------------|----------------------|
| <b>A. Medication Knowledge (at admission)</b>                | <b>Totally disagree</b> | <b>Disagree</b> | <b>Neutral</b> | <b>Agree</b> | <b>Totally agree</b> |
| A1. I know <i>why</i> I use my medicines                     |                         |                 |                |              |                      |
| A2. I know for each medicine that I use <i>why</i> I use it  |                         |                 |                |              |                      |
| A3. I know for each medicine that I use <i>how</i> to use it |                         |                 |                |              |                      |

Please response to the statements below during your hospitalisation.

| <b>B. Sense of medication safety, provision of information, and inpatient medication (during hospitalisation)</b> | <b>Totally disagree</b> | <b>Disagree</b> | <b>Neutral</b> | <b>Agree</b> | <b>Totally agree</b> |
|-------------------------------------------------------------------------------------------------------------------|-------------------------|-----------------|----------------|--------------|----------------------|
| B1. I think that continued use of the medicines I use at home reduces the number of medication errors.            |                         |                 |                |              |                      |
| B2. During hospitalisation it is clear to me which medicines from home I still use                                |                         |                 |                |              |                      |
| B3. I am informed about replacing a medicine that I use at home with a medicine from the hospital.                |                         |                 |                |              |                      |
| B4. When medication is started during admission, I am informed about this.                                        |                         |                 |                |              |                      |
| B5. I would like to be able to continue to use my medicines from home during the admission.                       |                         |                 |                |              |                      |
| B6. I would like to manage my medicines from home (when they are used during the admission) by myself.            |                         |                 |                |              |                      |

Please response to the statements below at your hospital discharge.

| <b>C. Medication Knowledge and provision of information (at discharge)</b> | <b>Totally disagree</b> | <b>Disagree</b> | <b>Neutral</b> | <b>Agree</b> | <b>Totally agree</b> |
|----------------------------------------------------------------------------|-------------------------|-----------------|----------------|--------------|----------------------|
| C1. I know <i>why</i> I use my medicines                                   |                         |                 |                |              |                      |
| C2. I know for each medicine that I use <i>why</i> I use it                |                         |                 |                |              |                      |
| C3. I know for each medicine that I use <i>how</i> to use it               |                         |                 |                |              |                      |
| C4. I have no more questions about my medication after admission.          |                         |                 |                |              |                      |
| C5. I know where or to whom I can go with my questions about medication.   |                         |                 |                |              |                      |
